# Supplementary material for: Fragility Index and Fragility Quotient in Randomized Controlled Trials on Corticosteroids in ARDS Due to COVID-19 and Non-COVID-19 Etiology
Source: MDPI journal article supplement (doi:10.3390/jcm10225287), 2021-11-14
Supplement: s1 [file s1]

| <b>Studies in ARDS</b>     | <b>N° of patients</b> | <b>Type of corticosteroids</b> | <b>Primary outcome</b>                                                          | <b>p-value mortality</b> |
|----------------------------|-----------------------|--------------------------------|---------------------------------------------------------------------------------|--------------------------|
| Beranard                   | 99                    | Methylprednisolone             |                                                                                 |                          |
| Meduri                     | 24                    | Methylprednisolone             | Improvement in lung function and mortality.                                     | 0.03                     |
| Confalonieri               | 46                    | Hydrocortisone                 | Improvement in P/F                                                              | 0.49                     |
| Steinberg                  | 180                   | Methylprednisolone             | Mortality at 60-days                                                            | 1                        |
| Annane                     | 177                   | Hydrocortisone                 | 28-day survival                                                                 | NS                       |
| meduri                     | 91                    | Methylprednisolone             | 1-point reduction in lung injury score (LIS) or successful extubation by day 7. | 0.21                     |
| Tongyoo                    | 197                   | Hydrocortisone                 | 28-day all-cause mortality                                                      | 0.46                     |
| Villar                     | 217                   | Dexamethasone                  | Ventilator free days at 28-day                                                  | 0.0047                   |
| <b>Studies in COVID-19</b> | <b>N° of patients</b> | <b>Type of corticosteroids</b> | <b>Main outcome</b>                                                             | <b>p-value mortality</b> |
| Tomazini                   | 299                   | Dexamethasone                  | Ventilator free days at 28-day                                                  | 0.31                     |
| Dequin                     | 149                   | Methylprednisolone             | Death at 21 days                                                                | 0.057                    |
| Jeronimo                   | 393                   | Methylprednisolone             | 28-day mortality                                                                | 0.629                    |
| Horby                      | 6425                  | Dexamethasone                  | 28-day mortality                                                                | < 0.001                  |
| Angus                      | 403                   | Hydrocortisone                 | Improvement organ support at 21 days                                            | NA                       |

Table S1: main characteristics of included studies. NA: not available, NS: non significant.
